# Supplementary material for: Phase purification of Cu–S system towards Cu1.8S and its catalytic properties for a clock reaction
Source: Royal Society of Chemistry journal article supplement (doi:10.1039/c5ra17652b), 2015-01-01
Supplement: c5ra17652b1.pdf [file c5ra17652b1.pdf]

Supporting Information for:

## **Phase Purification of Cu-S System towards Cu<sub>1.8</sub>S and its Catalytic Properties for a Clock Reaction**

Yuanjun Liu,<sup>a</sup> Guoxing Zhu,<sup>b, c, \*</sup> Jing Yang,<sup>b</sup> Chunlin Bao,<sup>b</sup> Jing Wang,<sup>a</sup> Aihua

Yuan<sup>a, \*</sup>

<sup>a</sup> *School of Environmental and Chemical Engineering, Jiangsu University of Science and  
Technology, Zhenjiang 212018, China. Email: [aihuayuan@just.edu.cn](mailto:aihuayuan@just.edu.cn)*

<sup>b</sup> *School of Chemistry and Chemical Engineering, Jiangsu University, Zhenjiang, 212013, China,  
Email: [zhuguoxing@ujs.edu.cn](mailto:zhuguoxing@ujs.edu.cn)*

<sup>c</sup> *State Key Laboratory of Coordination Chemistry, Nanjing University, Nanjing, 210093, China*

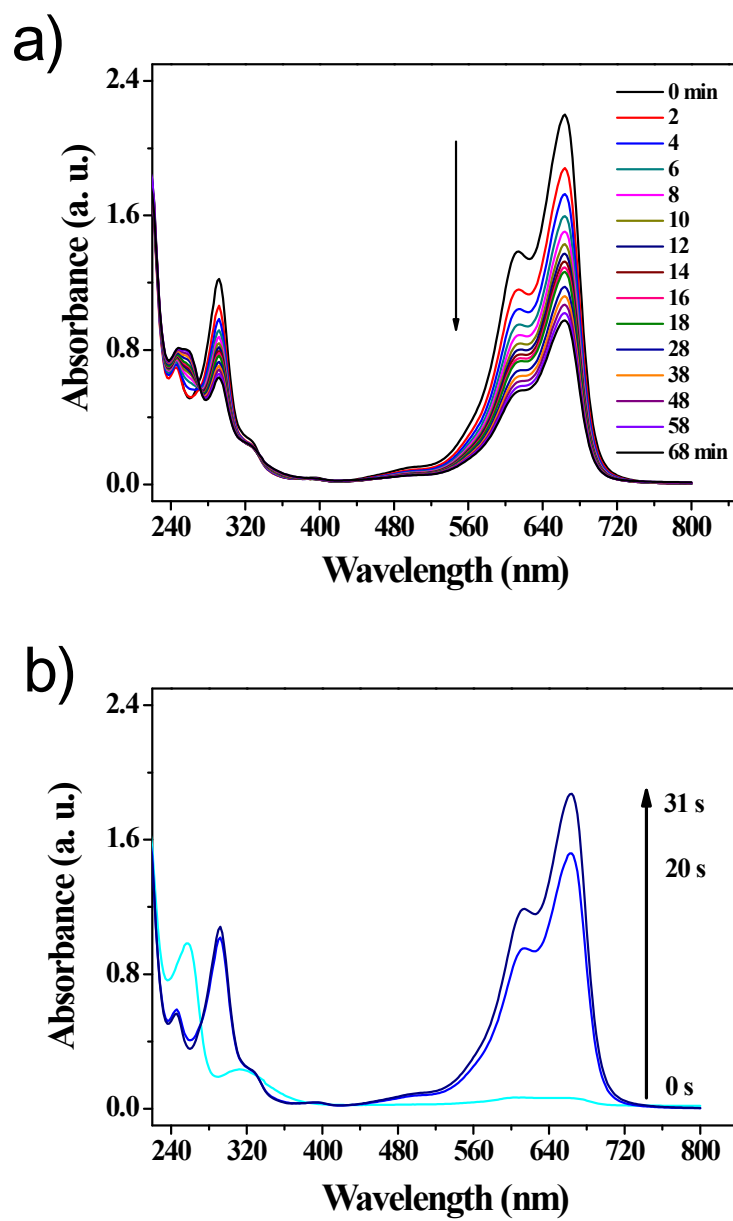

**Fig. SI-1.** a) Absorption spectra for successive decolorization of MB and b) colour regeneration catalyzed by  $\text{Cu}_{39}\text{S}_{28}$ .

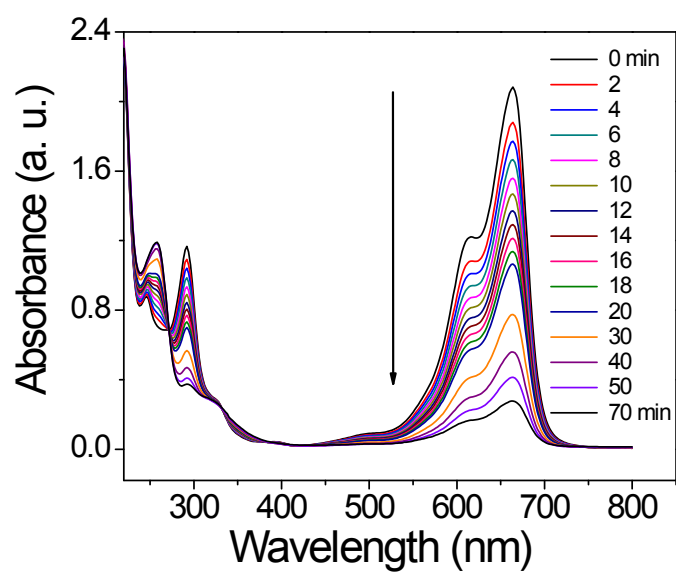

**Fig. SI-2.** Absorption spectra for successive decolorization of MB catalyzed by mixed phase copper sulfide ( $\text{CuS}$  and  $\text{Cu}_{1.8}\text{S}$ ).
